# Supplementary material
Source: PubMed Central journal article supplement (PMC3322842)

## Supplemental figure captions

**Fig. S1 Binding of leukotriene C4 with tablysin-15 before and after reversed phase chromatography in acetonitrile: water.** (A) Heats measured on injection (10  $\mu$ L per injection) of LTC4 (50  $\mu$ M) into a solution of tablysin-15 (5  $\mu$ M) that had not been purified by reversed phase chromatography. (B) For comparison, the same experiment as (A) with tablysin-15 that had been purified by reversed phase chromatography. (C) Enthalpies per injection for experiment shown in panel (A). (D) Enthalpies per injection for experiment shown in panel (B).

**Fig. S1**

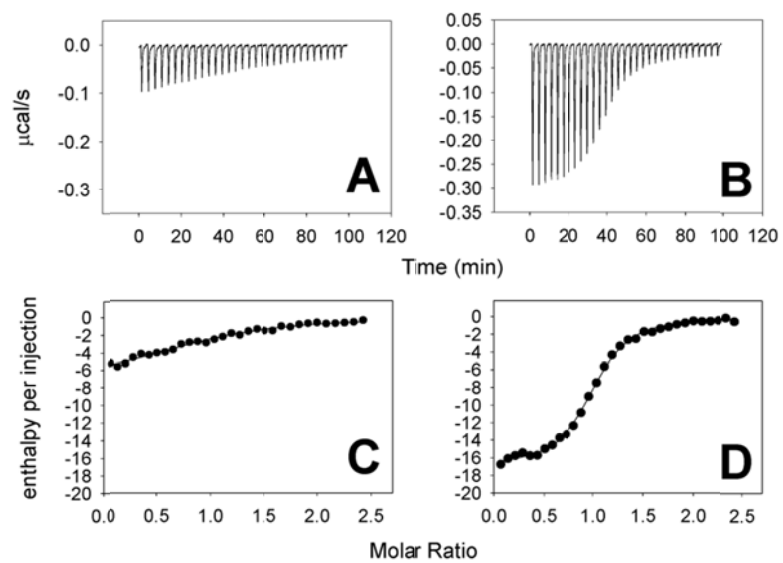

Supplement: supp_M112.340471_jbc.M112.340471-1.pdf [file supp_M112.340471_jbc.M112.340471-1.pdf]
